# Supplementary material
Source: publisher figshare collection journal article supplement (https://springernature.figshare.com/ndownloader/files/20287629)

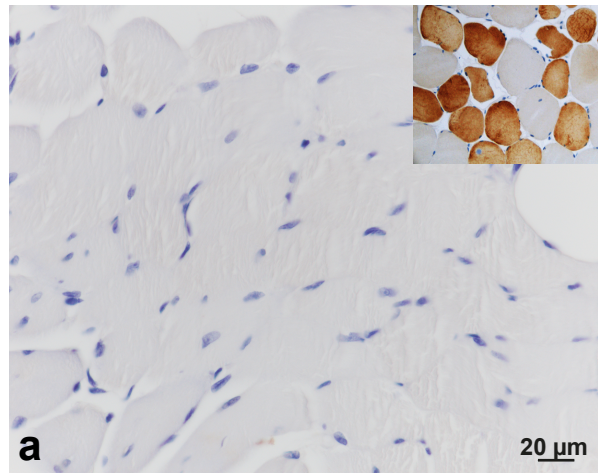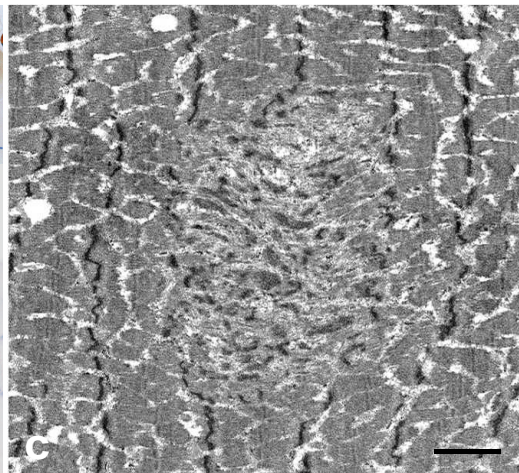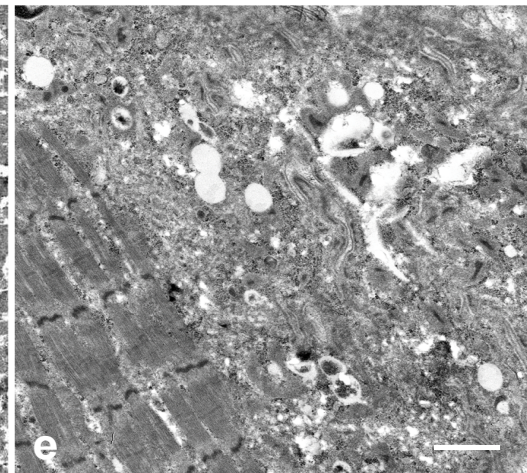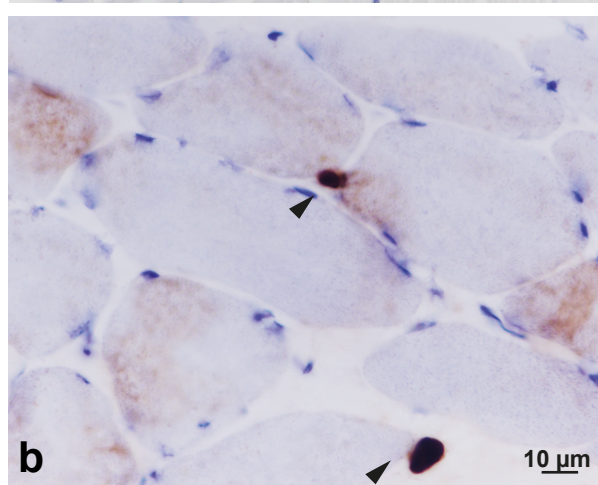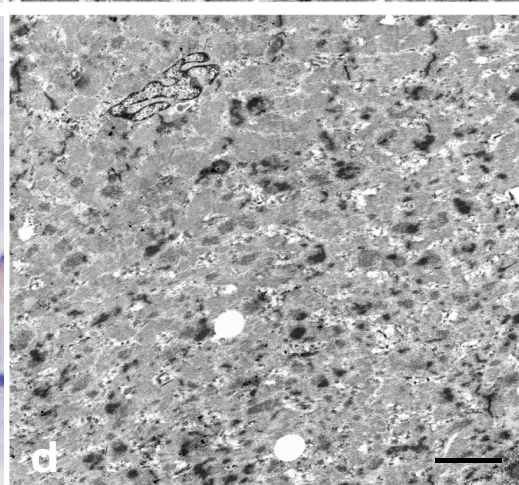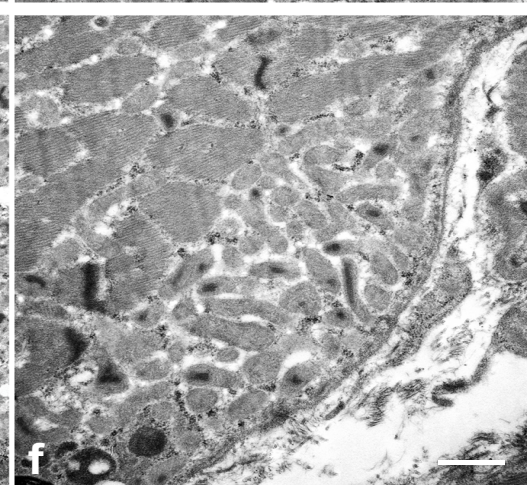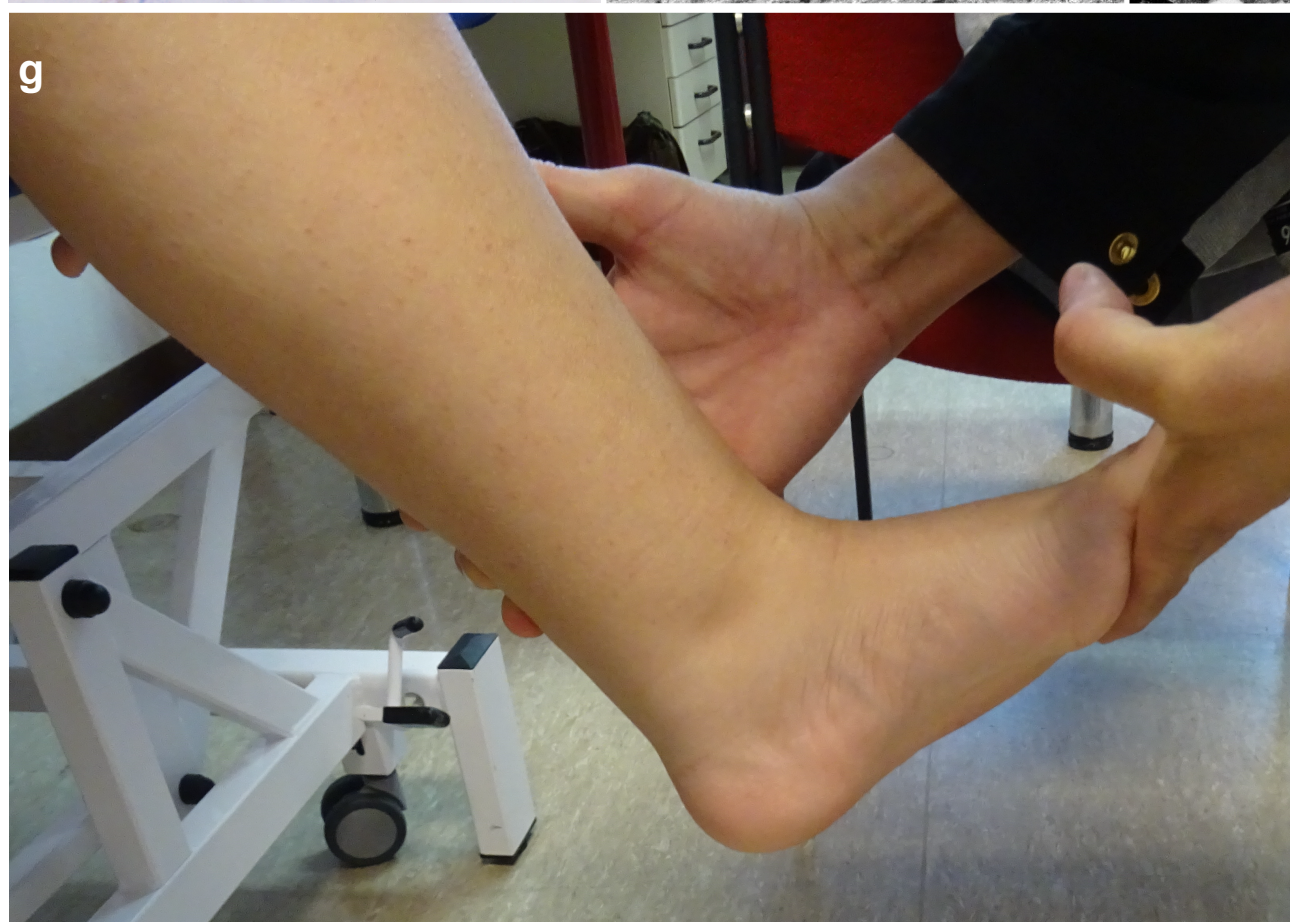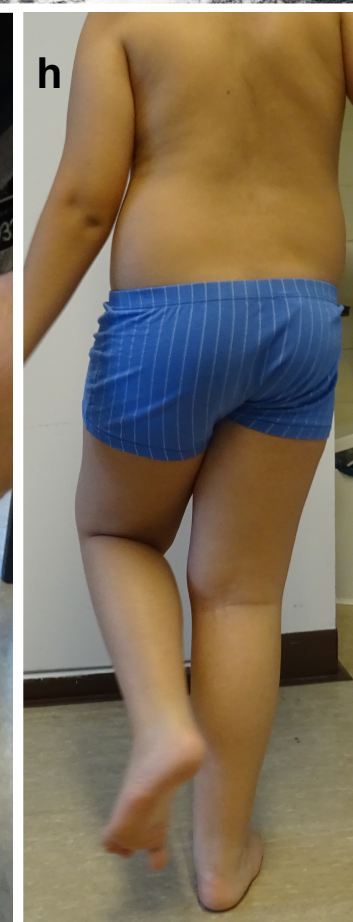



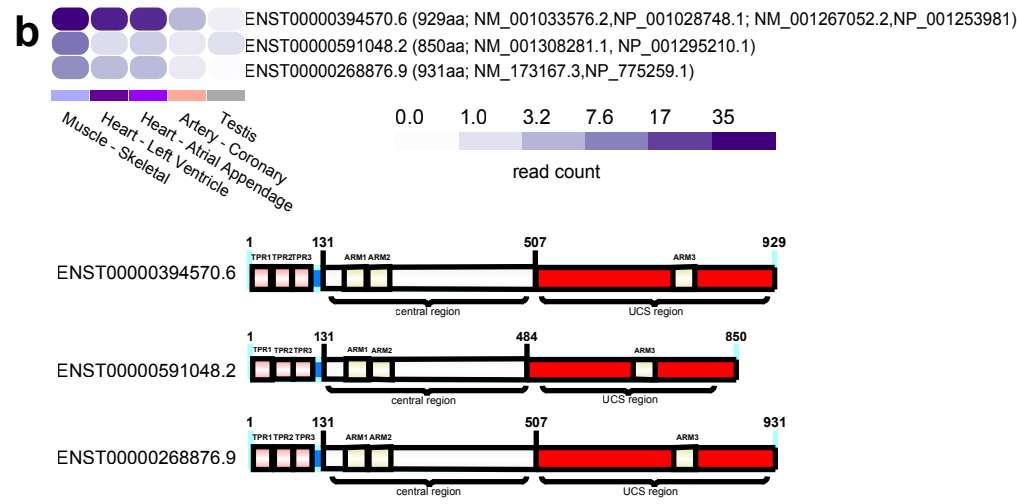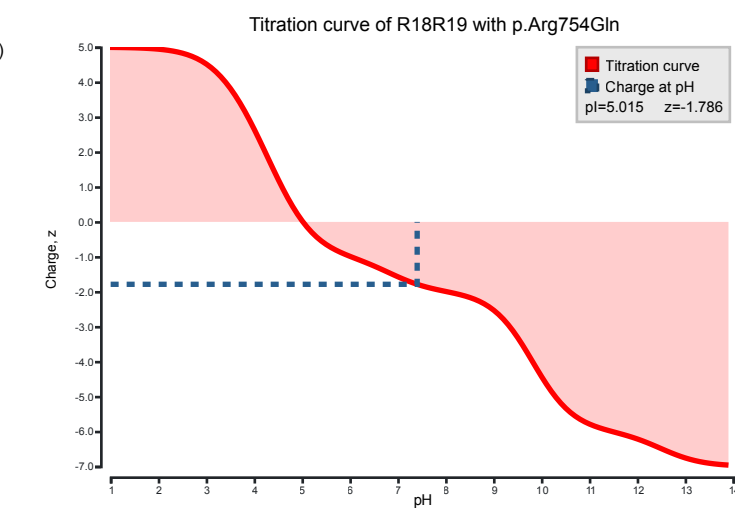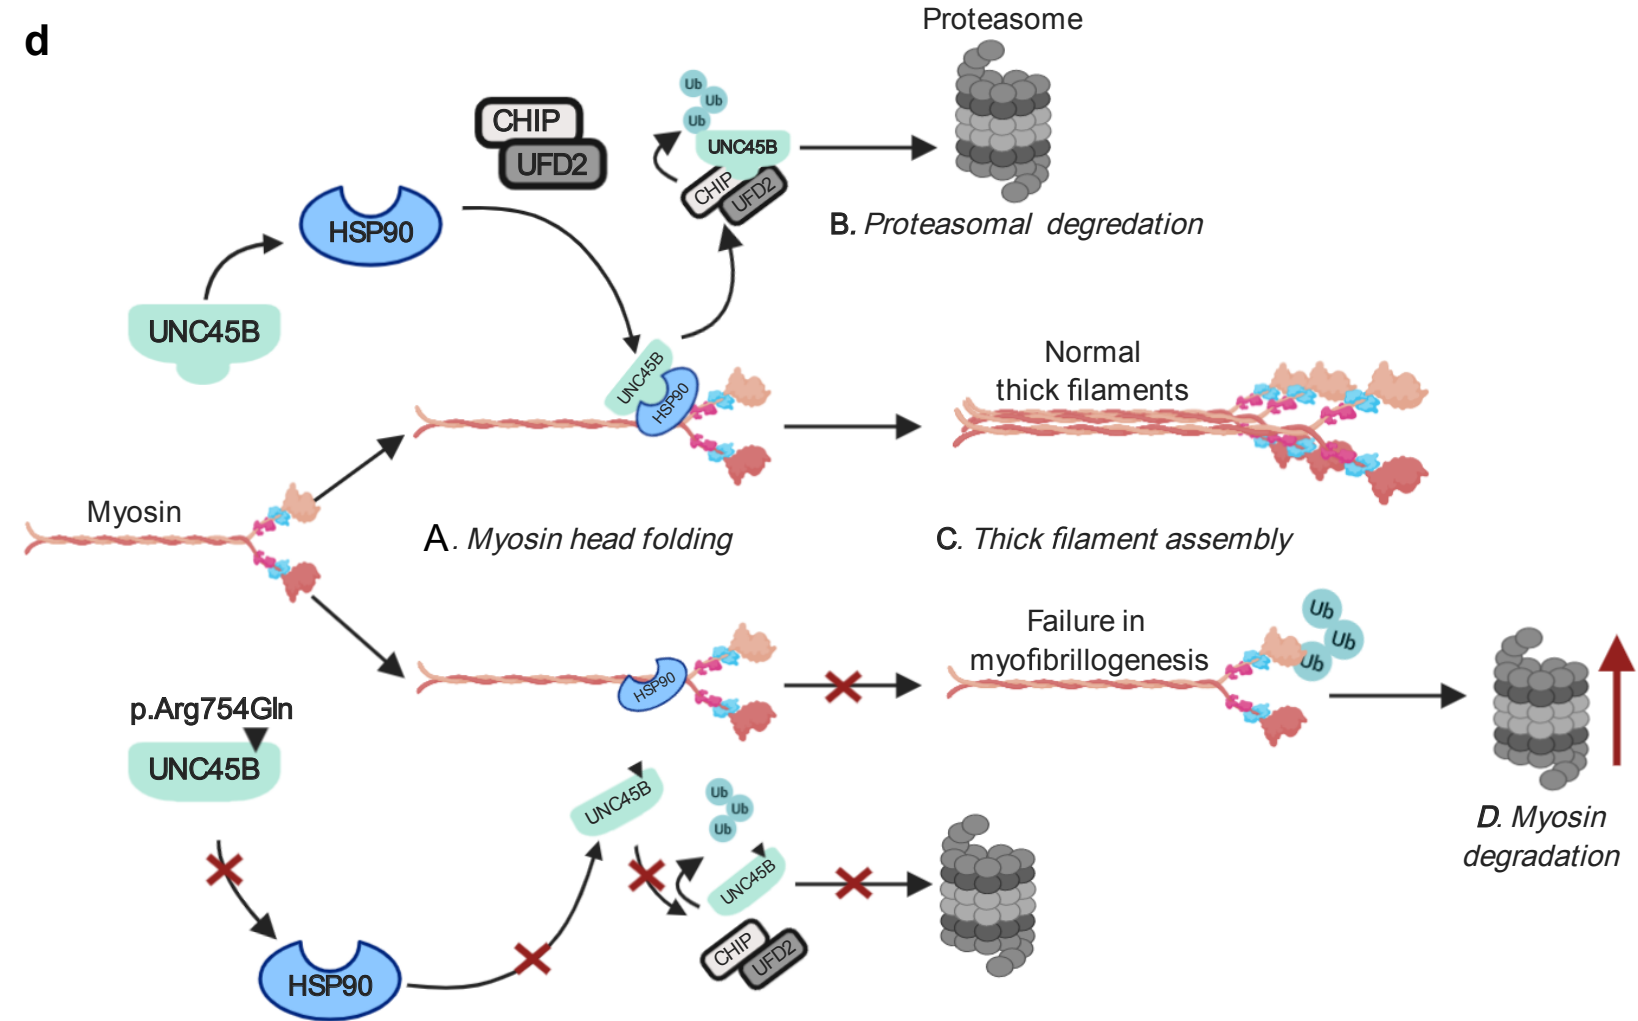

Supplement: Supplementary file 1 [file 20287629]
